# Supplementary material
Source: PubMed Central journal article supplement (PMC3656768)
Supplement: bi400425k_si_001.pdf [file bi400425k_si_001.pdf]

## Supporting Information

### **A Salt Bridge in Intracellular Loop 2 is Essential for Folding of Human P-glycoprotein.**

Tip W. Loo and David M. Clarke

*Department of Medicine and Department of Biochemistry, University of Toronto, Toronto, Ontario M5S 1A8, Canada.*

#### **Contents**

1. Experimental Procedures.
2. Figures

#### **1. Experimental Procedures.**

*Expression and Maturation of Mutants* – Mutations were introduced into the human P-gp cDNA as described previously (1). The mutants contained an A52 epitope tag at their C-terminal ends for use in whole cell immunoblot assays (2). The presence of the epitope tag distinguished the mutant proteins from any endogenous P-gp.

Mutants were expressed in HEK 293 cells for 18 h in the presence or absence of 10 mM cyclosporine A. Expression in the presence of drug substrates like cyclosporine A promotes maturation of processing mutants (3, 4). Whole cell extracts were subjected to immunoblot analysis using monoclonal antibody A52.

Glycosylation of P-gp can be used to differentiate mature human P-gp (170 kDa) from the immature 150 kDa protein (2). SDS extracts of cells expressing the mutant protein were treated with Endo H<sub>f</sub> or PNGase F (New England Biolabs, Mississauga, ON, Canada) and samples subjected to immunoblot analysis as described previously (5).

*Purification of P-gp and Measurement of ATPase Activity* – Histidine-tagged P-gps were expressed in HEK 293 cells and then isolated by nickel-chelate chromatography as described previously (6). Recovery of P-gp was monitored by immunoblot analysis with rabbit anti-P-gp polyclonal antibody (6). A sample of the isolated histidine-tagged P-gp was mixed with an equal

volume of 10 mg/ml sheep brain phosphatidylethanolamine (Type II-S, Sigma) that had been washed and suspended in TBS (pH 7.4). ATPase activity was measured in the presence of various concentrations of verapamil.

*Modeling of human ICL2* – The human ICL2 structures (7, 8) were viewed using Pymol (9).

## 2. Figures.

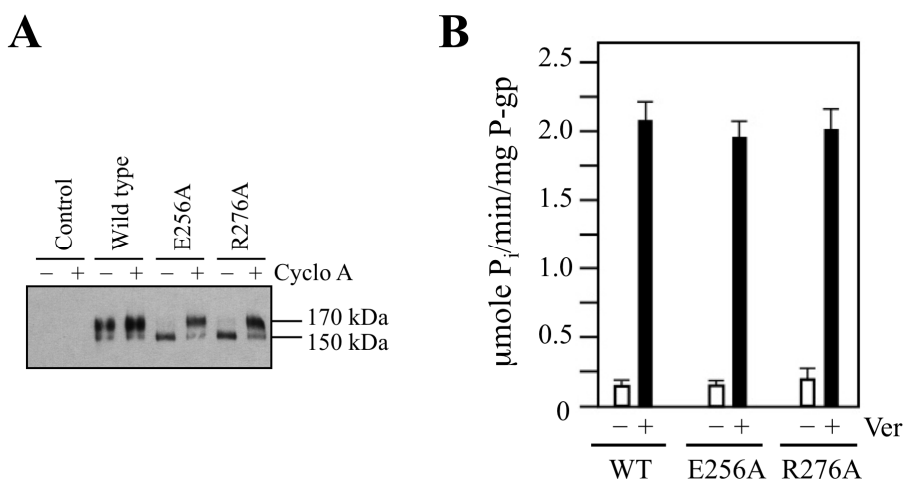

**Figure S1.** Rescue of salt bridge mutants. (A) Wild-type P-gp or mutants E256A or R276A were expressed in the presence (+) or absence (-) of cyclosporine A (Cyclo A) and whole cell SDS extracts subjected to immunoblot analysis. (B) ATPase activities of P-gps expressed in cyclosporin A were measured in the presence (+) or absence (-) of 0.6 mM verapamil (Ver). Each value is the mean  $\pm$  S.D. (n=3).

## REFERENCES

1. Loo, T. W., Bartlett, M. C., Detty, M. R., and Clarke, D. M. (2012) The ATPase activity of the P-glycoprotein drug pump is highly activated when the N-terminal and central

- regions of the nucleotide-binding domains are linked closely together. *J Biol Chem* 287, 26806-26816.
2. Loo, T. W., and Clarke, D. M. (1994) Functional consequences of glycine mutations in the predicted cytoplasmic loops of P-glycoprotein. *J. Biol. Chem.* 269, 7243-7248.
  3. Loo, T. W., and Clarke, D. M. (1999) The transmembrane domains of the human multidrug resistance P-glycoprotein are sufficient to mediate drug binding and trafficking to the cell surface. *J. Biol. Chem.* 274, 24759-24765.
  4. Loo, T. W., and Clarke, D. M. (1997) Correction of defective protein kinesis of human P-glycoprotein mutants by substrates and modulators. *J. Biol. Chem.* 272, 709-712.
  5. Loo, T. W., Bartlett, M. C., Wang, Y., and Clarke, D. M. (2006) The chemical chaperone CFcor-325 repairs folding defects in the transmembrane domains of CFTR processing mutants. *Biochem. J.* 395, 537-542.
  6. Loo, T. W., and Clarke, D. M. (1995) Covalent modification of human P-glycoprotein mutants containing a single cysteine in either nucleotide-binding fold abolishes drug-stimulated ATPase activity. *J. Biol. Chem.* 270, 22957-22961.
  7. Bikadi, Z., Hazai, I., Malik, D., Jemnitz, K., Veres, Z., Hari, P., Ni, Z., Loo, T. W., Clarke, D. M., Hazai, E., and Mao, Q. (2011) Predicting P-glycoprotein-mediated drug transport based on support vector machine and three-dimensional crystal structure of P-glycoprotein. *PLoS One* 6, e25815.
  8. Jin, M. S., Oldham, M. L., Zhang, Q., and Chen, J. (2012) Crystal structure of the multidrug transporter P-glycoprotein from *Caenorhabditis elegans*. *Nature* 490, 566-569.
  9. DeLano, W. L. (2002) The PyMol Molecular Graphics System *DeLano Scientific, Palo Alto, CA, USA.* , <<http://www.pymol.org>>
